# Supplementary material for: New alkali earth metal–organic frameworks with a very high thermal stability: synthesis, crystal structure, and characterization of AE[NC5H3(CO2)2] (AE = Ba or Sr)
Source: Royal Society of Chemistry journal article supplement (doi:10.1039/c0ce00937g), 2011-01-01

Electronic Supplementary Information (ESI) for:

**New alkali earth metal-organic frameworks with very high thermal stability: Synthesis, crystal structure, and characterization of**  
**AE[NC<sub>5</sub>H<sub>3</sub>(CO<sub>2</sub>)<sub>2</sub>] (AE = Ba or Sr)**

Min Kyung Kim and Kang Min Ok\*

Department of Chemistry, Chung-Ang University, Seoul, 156-756, Republic of Korea

- S1. Experimental and calculated powder X-ray diffraction patterns for Ba[NC<sub>5</sub>H<sub>3</sub>(CO<sub>2</sub>)<sub>2</sub>]
- S2. Experimental and calculated powder X-ray diffraction patterns for Sr[NC<sub>5</sub>H<sub>3</sub>(CO<sub>2</sub>)<sub>2</sub>]
- S3. IR vibrations (cm<sup>-1</sup>) for Ba[NC<sub>5</sub>H<sub>3</sub>(CO<sub>2</sub>)<sub>2</sub>]
- S4. IR vibrations (cm<sup>-1</sup>) for Sr[NC<sub>5</sub>H<sub>3</sub>(CO<sub>2</sub>)<sub>2</sub>]
- S5. Nitrogen gas adsorption isotherm for Ba[NC<sub>5</sub>H<sub>3</sub>(CO<sub>2</sub>)<sub>2</sub>] at 77 K

S1. Experimental and calculated powder X-ray diffraction patterns for Ba[NC<sub>5</sub>H<sub>3</sub>(CO<sub>2</sub>)<sub>2</sub>]

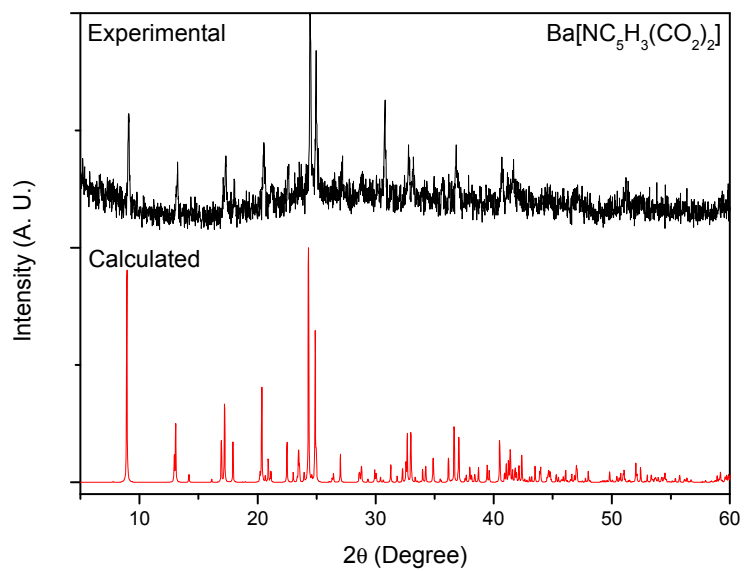

S2. Experimental and calculated powder X-ray diffraction patterns for Sr[NC<sub>5</sub>H<sub>3</sub>(CO<sub>2</sub>)<sub>2</sub>]

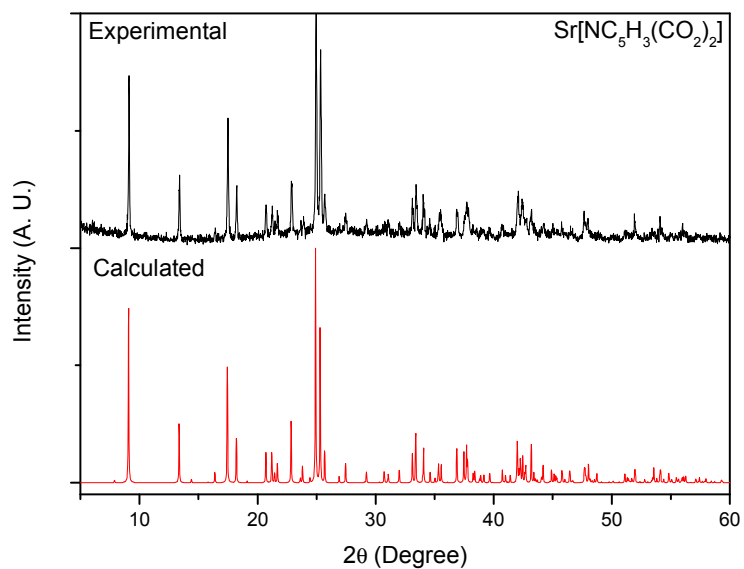

S3. IR vibrations ( $\text{cm}^{-1}$ ) for  $\text{Ba}[\text{NC}_5\text{H}_3(\text{CO}_2)_2]$

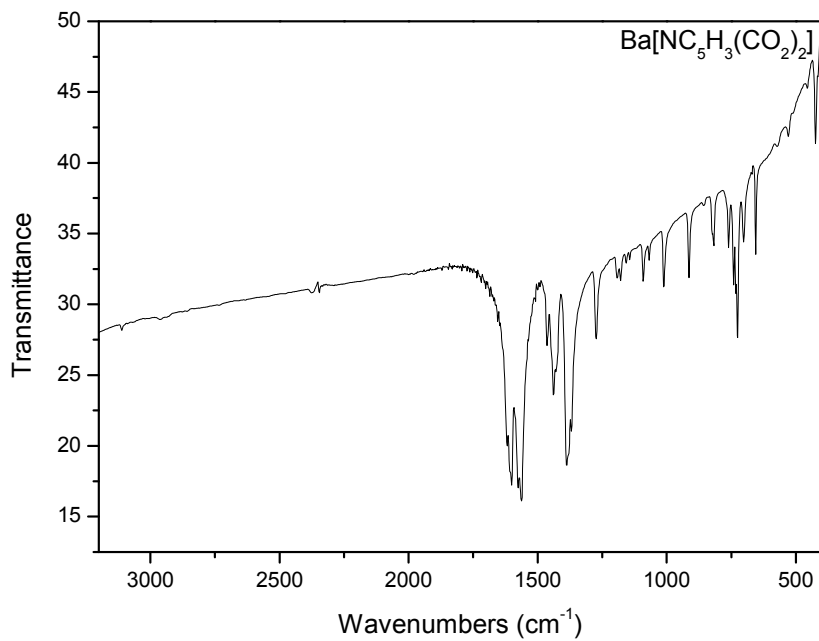

S4. IR vibrations ( $\text{cm}^{-1}$ ) for  $\text{Sr}[\text{NC}_5\text{H}_3(\text{CO}_2)_2]$

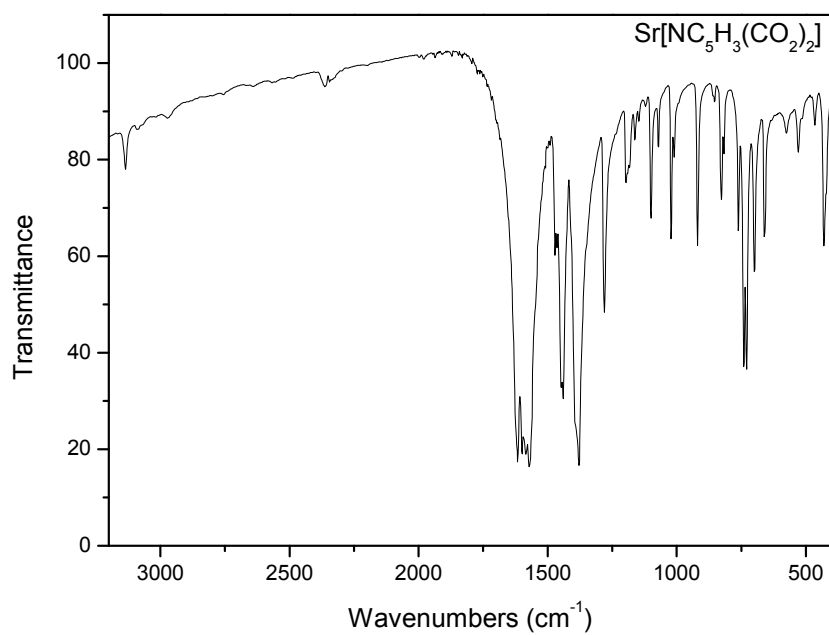

S5. Nitrogen gas adsorption isotherm for Ba[NC<sub>5</sub>H<sub>3</sub>(CO<sub>2</sub>)<sub>2</sub>] at 77 K

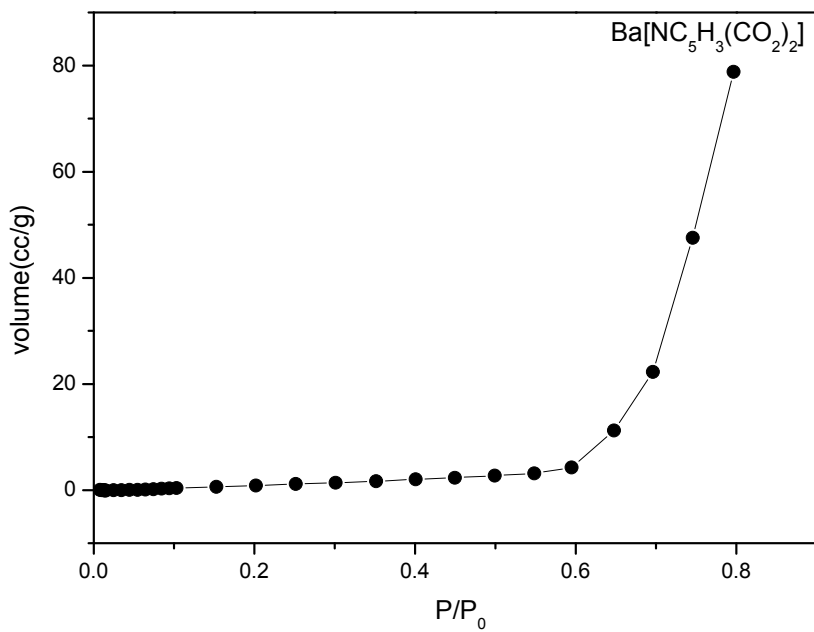

Supplement: c0ce00937g.pdf [file c0ce00937g.pdf]
